# Supplementary material for: Biomarkers of mitochondrial permeability transition-driven necrosis in the regulation of ulcerative colitis
Source: PeerJ journal article supplement (doi:10.7717/peerj.20345), 2025-12-05
Supplement: Data_set_summary_StaffER.docx [file Data_set_summary_StaffER.docx]

Supplementary Table 1

| GEO datasets | Platform | Samples source | Normal vs UC | Type |
| --- | --- | --- | --- | --- |
| GSE87466 | GPL13158 | Colon tissue | 21 VS 87 | DEGs、Machine learning、 Immunoinfiltration analysis |
| GSE75214 | GPL6244 | Colon tissue | 11 VS 97 | WGCNA、 Immunoinfiltration analysis |
| GSE206285 | GPL15798 | Colon tissue | 18 VS 550 | validation |
| GSE16879 | GPL570 | Colon tissue | 12 VS 24 | Drug sensitivity analysis |

All information is available at https://www.ncbi.nlm.nih.gov/geo/query/acc.cgi.
