# Supplementary material for: Biomarkers of mitochondrial permeability transition-driven necrosis in the regulation of ulcerative colitis
Source: PeerJ journal article supplement (doi:10.7717/peerj.20345), 2025-12-05
Supplement: MPTDN_gene.xlsx [file MPTDN_gene.xlsx]

## Sheet: Sheet1
	Gene
1	APAF1
2	ARHGDIB
3	BIRC2
4	BIRC3
5	CASP1
6	CASP10
7	CASP2
8	CASP3
9	CASP4
10	CASP6
11	CASP7
12	CASP8
13	CASP9
14	DFFA
15	DFFB
16	GZMB
17	LMNA
18	LMNB1
19	LMNB2
20	PARP1
21	PRF1
22	XIAP
23	AKT1
24	ATM
25	BAD
26	BAX
27	BCL2
28	BID
29	EIF2S1
30	PRKCA
31	PRKCB
32	STAT1
33	TLN1
34	TP53
35	AIFM1
36	BAK1
37	BIK
38	DIABLO
39	ENDOG
