# Supplementary material for: Biomarkers of mitochondrial permeability transition-driven necrosis in the regulation of ulcerative colitis
Source: PeerJ journal article supplement (doi:10.7717/peerj.20345), 2025-12-05
Supplement: Primer_sequences_StaffER.docx [file Primer_sequences_StaffER.docx]

Supplementary Table 2

| gene symbol | Forward 5’-3’ | Reverse 5’-3’ |
| --- | --- | --- |
| CASP1 | CAGGCAAGCCAAATCTTTATCAC | TCCAACCCTCGGAGAAAGATG |
| CASP4 | GACTTAGGCTACGATGTGGTGGT | TGATGACTTTGGGTTTGTCTCGT |
| GAPDH | CCTCGTCCCGTAGACAAAATG | TGAGGTCAATGAAGGGGTCGT |

| gene symbol | Forward 5’-3’ | Reverse 5’-3’ |
| --- | --- | --- |
| CASP1 | ACAAGGCACGGGACCTATG | TCCCAGTCAGTCCTGGAAATG |
| CASP4 | GACTTAGGCTACGATGTGGTGGT | TGATGACTTTGGGTTTGTCTCGT |
| GAPDH | CCTCGTCCCGTAGACAAAATG | TGAGGTCAATGAAGGGGTCGT |
